# Supplementary material for: Protein quality of soy and the effect of processing: A quantitative review
Source: Frontiers journal article supplement (doi:10.3389/fnut.2022.1004754), 2022-09-27
Supplement: Data_Sheet_1.pdf [file Data_Sheet_1.pdf]

## *Supplementary Material*

### **INDEX**

|                              |    |
|------------------------------|----|
| Supplementary Figure 1 ..... | 2  |
| Supplementary Table 1 .....  | 2  |
| Supplementary Table 2 .....  | 3  |
| Supplementary Figure 2 ..... | 3  |
| Supplementary Figure 3 ..... | 3  |
| Supplementary Table 3 .....  | 4  |
| Supplementary Table 4 .....  | 4  |
| Supplementary Table 5 .....  | 10 |
| Supplementary Table 6 .....  | 10 |

|                                                                                                                                                                                                                                 |
|---------------------------------------------------------------------------------------------------------------------------------------------------------------------------------------------------------------------------------|
| <b>(Exposure)</b><br>(protein*) [tiab]                                                                                                                                                                                          |
| <b>(Outcome)</b><br>AND<br>(Digestible indispensable amino acid score) [tiab] OR<br>(DIAAS) [tiab] OR<br>(Protein digestibility corrected amino acid score) [tiab] OR<br>(PDCAAS) [tiab] OR<br>(Ileal AND digestibility) [tiab] |
| <b>(Limits)</b><br>NOT (broiler*) [tiab]                                                                                                                                                                                        |

Supplementary Figure 2: Search strategy.

Supplementary Table 1: Amino acid scoring patterns for DIAAS calculations from the 2013 FAO report [13].

| Amino acid<br>(mg/g crude protein) | Infant<br>(0-0.5 years) | Child<br>(0.5-3 years) | Child (>3 years),<br>adolescent, adult |
|------------------------------------|-------------------------|------------------------|----------------------------------------|
| Histidine                          | 21                      | 20                     | 16                                     |
| Isoleucine                         | 55                      | 32                     | 30                                     |
| Leucine                            | 96                      | 66                     | 61                                     |
| Lysine                             | 69                      | 57                     | 48                                     |
| SAA                                | 33                      | 27                     | 23                                     |
| AAA                                | 94                      | 52                     | 41                                     |
| Threonine                          | 44                      | 31                     | 25                                     |
| Tryptophan                         | 17                      | 8.5                    | 6.6                                    |
| Valine                             | 55                      | 43                     | 35                                     |

Supplementary Table 2: Amino acid scoring patterns for PDCAAS calculations from the 1985 WHO report [19].

| Amino acid<br>(mg/g crude protein) | Pre-school child<br>(2-5 years) | School child<br>(10-12 years) | Adult |
|------------------------------------|---------------------------------|-------------------------------|-------|
| Histidine                          | 19                              | 19                            | 16    |
| Leucine                            | 28                              | 28                            | 13    |
| Isoleucine                         | 66                              | 44                            | 19    |
| Lysine                             | 58                              | 44                            | 16    |
| SAA                                | 25                              | 22                            | 17    |
| AAA                                | 63                              | 22                            | 19    |
| Threonine                          | 34                              | 28                            | 9     |
| Tryptophan                         | 11                              | 9                             | 5     |
| Valine                             | 35                              | 25                            | 13    |

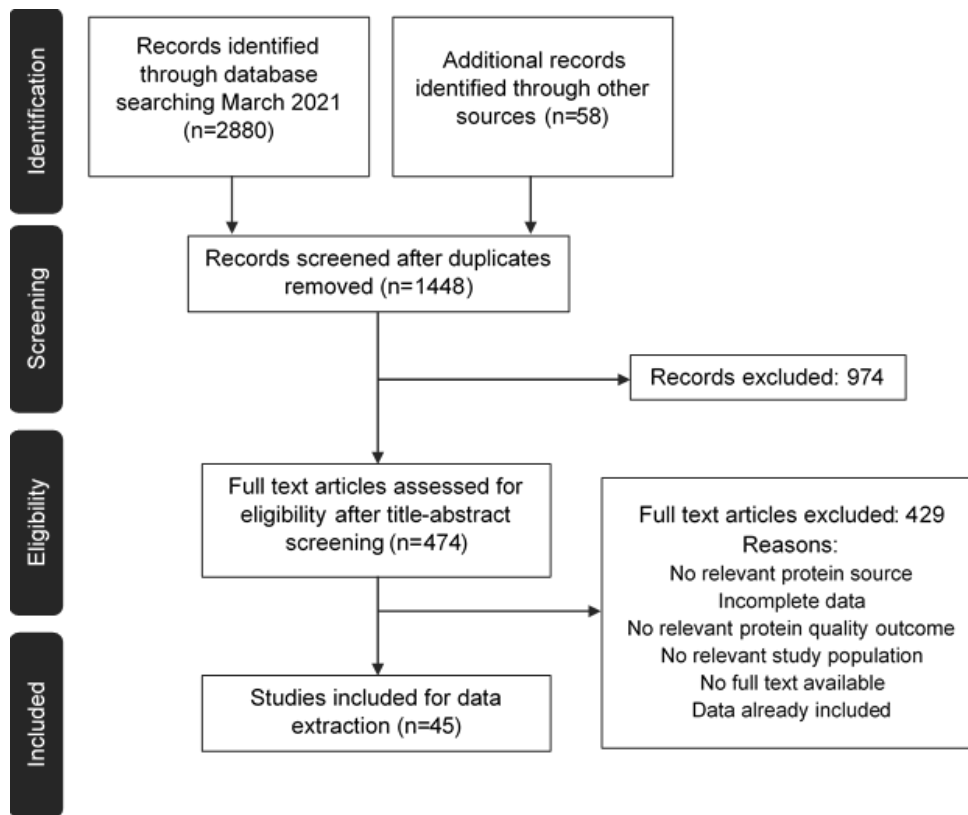

**Supplementary Figure 2:** Flowchart of literature screening.

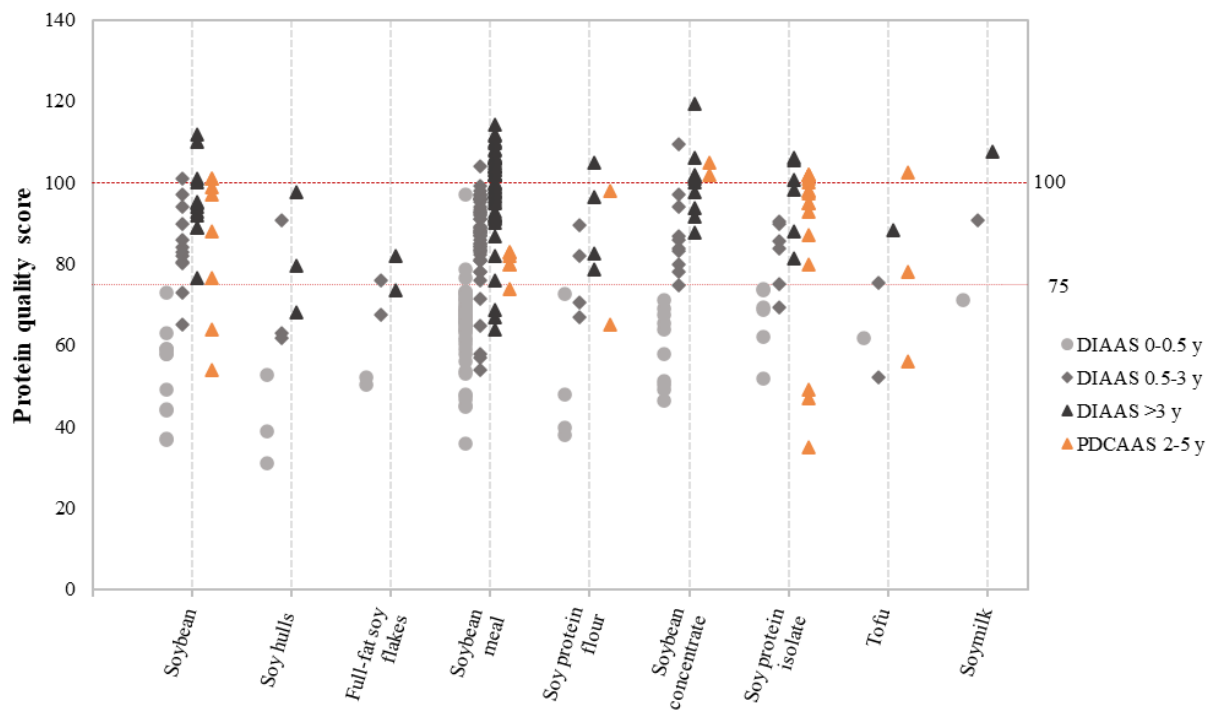

**Supplementary Figure 3:** Variation in DIAAS and PDCAAS of different soy products obtained from in-vivo and in-vitro studies. DIAAS calculated for three reference scoring patterns (2013 FAO report [13]) and PDCAAS for reference scoring pattern of children aged 2-5 year (1985 WHO report [19]).

**Supplementary Table 3:** Crude protein (mean  $\pm$  SD) of soy product groups.

|                                         | Soybean<br>(n=17) | Soy hulls<br>(n=3) | Full-fat soy<br>flakes (n=2) | SBM<br>(n=54)    | Soy flour<br>(n=5) | SPC<br>(n=12)    | SPI<br>(n=12)    | Tofu<br>(n=3)    | Soymilk<br>(n=1) | Total soy<br>(n=109) |
|-----------------------------------------|-------------------|--------------------|------------------------------|------------------|--------------------|------------------|------------------|------------------|------------------|----------------------|
| <b>Crude protein<br/>(% wet matter)</b> | 38.45 $\pm$ 3.24  | 10.31 $\pm$ 0.99   | 40.16 $\pm$ 0.03             | 48.45 $\pm$ 4.19 | 54.50 $\pm$ 2.18   | 66.82 $\pm$ 4.50 | 84.38 $\pm$ 5.72 | 14.47 $\pm$ 5.84 | 3.82             | 50.60 $\pm$ 17.39    |

**Supplementary Table 4:** Reported digestible indispensable amino acids scores (DIAAS) and protein digestibility corrected amino acid scores (PDCAAS) (untruncated) for different soy products. DIAAS based on reference pattern score of children aged 0.5-3 years (2013 FAO report [1]). PDCAAS based on reference pattern score of children aged 2-5 years (1985 WHO report [2]).

| Product | Additional information                                                      | Post-processing of product                                                                                                                                                                                                                                                         | Type of study   | Crude protein<br>(% wet matter) | DIAAS | PDCAAS | Limiting AA | References |
|---------|-----------------------------------------------------------------------------|------------------------------------------------------------------------------------------------------------------------------------------------------------------------------------------------------------------------------------------------------------------------------------|-----------------|---------------------------------|-------|--------|-------------|------------|
| Soybean | Conventional soybean<br>High-protein soybean<br>Low-oligosaccharide soybean | Heat-treated<br>Wet heated (100 °C, 16 min)<br>+ expanded (125°C, 15 sec) +<br>autoclaved (110 °C, 60 min)<br>Treated ( <i>unknown</i> )<br>Boiled (100°C)<br>Boiled (100°C)<br>Boiled (100°C)<br>Boiled (100°C)<br>Extruded (150 °C)<br>Extruded (150 °C)<br>Extruded<br>Extruded | <i>In-vitro</i> | 37.6                            |       | 77     | Thr         | [3]        |
|         |                                                                             |                                                                                                                                                                                                                                                                                    | <i>In-vitro</i> | 37.2                            |       | 88     | Lys         | [3]        |
|         |                                                                             |                                                                                                                                                                                                                                                                                    | Growing pigs    | 38.6                            | 80    |        | AAA         | [4]        |
|         |                                                                             |                                                                                                                                                                                                                                                                                    | Growing pigs    | 37.6                            | 82    |        | n/a         | [5]        |
|         |                                                                             |                                                                                                                                                                                                                                                                                    | Growing pigs    | 42.8                            | 86    |        | n/a         | [5]        |
|         |                                                                             |                                                                                                                                                                                                                                                                                    | Growing pigs    | 39.3                            | 101   |        | n/a         | [5]        |
|         |                                                                             |                                                                                                                                                                                                                                                                                    | Pigs            | 36.3                            | 84    |        | SAA         | [6]        |
|         |                                                                             |                                                                                                                                                                                                                                                                                    | Growing pigs    | 37.3                            | 79    |        | SAA         | [7]        |
|         |                                                                             |                                                                                                                                                                                                                                                                                    | Pigs            | 35.8                            | 90    |        | SAA         | [8]        |
|         |                                                                             |                                                                                                                                                                                                                                                                                    | Weanling rats   | 35.2                            |       | 101    | Lys         | [9]        |
|         |                                                                             |                                                                                                                                                                                                                                                                                    | Weanling rats   | 35.5                            |       | 99     | Lys         | [9]        |
|         |                                                                             |                                                                                                                                                                                                                                                                                    | Weanling rats   | 34.6                            |       | 97     | Lys         | [9]        |
|         |                                                                             |                                                                                                                                                                                                                                                                                    | Weanling rats   | 36.7                            |       | 101    | Lys         | [9]        |
|         |                                                                             |                                                                                                                                                                                                                                                                                    | Growing pigs    | 35.8                            | 97    |        | Trp         | [10]       |
|         |                                                                             |                                                                                                                                                                                                                                                                                    | Growing pigs    | 47.6                            | 73    |        | Trp         | [10]       |
|         |                                                                             |                                                                                                                                                                                                                                                                                    | Piglets         | 39.2                            | 65    |        | SAA         | [11]       |
|         |                                                                             |                                                                                                                                                                                                                                                                                    | Growing pigs    | 34.8                            | 94    |        | n/a         | [12]       |

| Product                    | Additional information                                                      | Post-processing of product                         | Type of study  | Crude protein<br>(% wet matter) | DIAAS | PDCAAS | Limiting AA | References |
|----------------------------|-----------------------------------------------------------------------------|----------------------------------------------------|----------------|---------------------------------|-------|--------|-------------|------------|
|                            | Conventional soybean                                                        | Dry heated (89 °C ,5 min)                          | Rats           | 41.9                            |       | 54     | SAA         | [13]       |
|                            | Kunitz trypsin inhibitor and lipoxxygenase free soybean                     | Dry heated (89 °C, 5 min)                          | Rats           | 40.0                            |       | 64     | SAA         | [13]       |
|                            |                                                                             | Toasted                                            | Growing pigs   | 35.2                            | 83    |        | n/a         | [12]       |
| <b>Soy hulls</b>           |                                                                             |                                                    | Pigs           | 11.5                            | 63    |        | Leu         | [6]        |
|                            |                                                                             |                                                    | Growing pigs   | 9.8                             | 62    |        | Trp         | [14]       |
|                            |                                                                             | Extruded (80 °C)                                   | Growing pigs   | 9.7                             | 91    |        | Leu         | [14]       |
| <b>Full-fat soy flakes</b> | Low-oligosaccharide soybean flakes                                          | Cooked at infrared radiant energy (105 °C, 50 sec) | Grower pigs    | 40.2                            | 76    |        | Leu         | [15]       |
|                            | Regular-oligosaccharide soybean flakes                                      | Cooked at infrared radiant energy (105 °C, 50 sec) | Grower pigs    | 40.1                            | 68    |        | SAA         | [15]       |
| <b>Soybean meal</b>        |                                                                             |                                                    | Growing pigs   | 48.3                            | 94    |        | SAA         | [16]       |
|                            |                                                                             |                                                    | Grower pigs    | 46.1                            | 84    |        | SAA         | [17]       |
|                            | Conventional soybean meal                                                   |                                                    | Growing pigs   | 48.4                            | 96    |        | SAA         | [18]       |
|                            | High-protein soybean meal                                                   |                                                    | Growing pigs   | 55.7                            | 97    |        | Leu         | [18]       |
|                            | Conventional soybean meal                                                   |                                                    | Weanling pigs  | 47.8                            | 87    |        | SAA         | [19]       |
|                            |                                                                             |                                                    | Finishing pigs | 49.8                            | 83    |        | SAA         | [20]       |
|                            | Soybean meal from Korea 1                                                   |                                                    | Growing pigs   | 47.1                            | 57    |        | SAA         | [21]       |
|                            | Soybean meal from Korea 2                                                   |                                                    | Growing pigs   | 47.4                            | 81    |        | Trp         | [21]       |
|                            | Soybean meal from India                                                     |                                                    | Growing pigs   | 39.6                            | 65    |        | SAA         | [21]       |
|                            |                                                                             |                                                    | Growing pigs   | 45.2                            | 85    |        | SAA         | [22]       |
|                            |                                                                             |                                                    | Growing pigs   | 53.1                            | 86    |        | SAA         | [23]       |
|                            | Soybean meal, expelled                                                      |                                                    | Pigs           | 43.8                            | 93    |        | SAA         | [6]        |
|                            | Soybean meal (crude fiber <45 – crude protein >490 g/kg), solvent extracted |                                                    | Pigs           | 48.5                            | 96    |        | Lys         | [6]        |
|                            |                                                                             |                                                    | Weanling pigs  | 44.5                            | 92    |        | SAA         | [24]       |
|                            |                                                                             |                                                    | Weanling pigs  | 45.0                            | 88    |        | SAA         | [25]       |
|                            |                                                                             | Microbially Fermented                              | Weanling pigs  | 53.9                            | 84    |        | Lys         | [26]       |
|                            | Conventional soybean meal                                                   |                                                    | Weanling pigs  | 50.2                            | 82    |        | SAA         | [26]       |
|                            |                                                                             |                                                    | Weanling pigs  | 47.7                            | 88    |        | SAA         | [27]       |

| Product | Additional information                                   | Post-processing of product | Type of study           | Crude protein<br>(% wet matter) | DIAAS | PDCAAS | Limiting AA | References |
|---------|----------------------------------------------------------|----------------------------|-------------------------|---------------------------------|-------|--------|-------------|------------|
|         |                                                          |                            | Growing pigs            | 42.9                            | 93    |        | Val         | [10]       |
|         |                                                          |                            | Growing pigs            | 47.1                            | 84    |        | SAA         | [28]       |
|         |                                                          |                            | Growing pigs            | 49.5                            | 83    |        | SAA         | [29]       |
|         |                                                          |                            | Growing pigs            | 43.6                            | 94    |        | SAA         | [14]       |
|         |                                                          |                            | Growing pigs            | n/a                             | 93    |        | Val         | [30]       |
|         |                                                          |                            | Weanling pigs           | 45.1                            | 85    |        | Val         | [31]       |
|         |                                                          |                            | Growing pigs            | 45.6                            | 71    |        | Trp         | [32]       |
|         |                                                          |                            | Growing pigs            | 47.2                            | 96    |        | SAA         | [15]       |
|         | Soybean meal dehulled, expelled                          |                            | Growing pigs            | 45.1                            | 91    |        | n/a         | [5]        |
|         | Soybean meal dehulled solvent<br>extracted               |                            | Growing pigs            | 47.7                            | 92    |        | n/a         | [5]        |
|         | Soybean meal expelled                                    |                            | Growing pigs            | 44.6                            | 91    |        | n/a         | [5]        |
|         | High-protein soybean meal<br>dehulled, solvent extracted |                            | Growing pigs            | 51.2                            | 89    |        | n/a         | [5]        |
|         | High-protein soybean meal<br>expelled                    |                            | Growing pigs            | 56.0                            | 89    |        | n/a         | [5]        |
|         | Soybean meal solvent extracted                           |                            | Growing pigs            | 43.9                            | 86    |        | n/a         | [5]        |
|         | Low oligosaccharide soybean<br>meal expelled             |                            | Growing pigs            | 49.3                            | 97    |        | n/a         | [5]        |
|         |                                                          |                            | Growing pigs            | 44.8                            | 99    |        | Val         | [33]       |
|         | GMO-free soybean meal                                    |                            | Growing pigs            | 47.0                            | 81    |        | SAA         | [34]       |
|         |                                                          |                            | Growing pigs            | 43.3                            | 104   |        | SAA         | [35]       |
|         | Soybean meal 46                                          |                            | Growing pigs            | 43.4                            | 96    |        | n/a         | [12]       |
|         | Soybean meal 48                                          |                            | Growing pigs            | 45.3                            | 96    |        | n/a         | [12]       |
|         | Soybean meal 50                                          |                            | Growing pigs            | 47.2                            | 98    |        | n/a         | [12]       |
|         |                                                          |                            | Early weaned<br>piglets | 46.2                            | 88    |        | Leu         | [36]       |
|         |                                                          | Microbially fermented      | Early weaned<br>piglets | 56.2                            | 88    |        | Lys         | [36]       |
|         |                                                          | Microbially Fermented      | Growing pigs            | 42.5                            | 58    |        | Lys         | [37]       |

| Product                        | Additional information                                                                                                                                                     | Post-processing of product                                  | Type of study | Crude protein<br>(% wet matter) | DIAAS | PDCAAS | Limiting AA            | References |
|--------------------------------|----------------------------------------------------------------------------------------------------------------------------------------------------------------------------|-------------------------------------------------------------|---------------|---------------------------------|-------|--------|------------------------|------------|
|                                | Enzyme-treated soybean meal 1<br>Enzyme-treated soybean meal 2                                                                                                             | Microbially Fermented                                       | Growing pigs  | 54.1                            | 76    |        | n/a                    | [5]        |
|                                |                                                                                                                                                                            | Microbially Fermented                                       | Weanling pigs | 53.7                            | 78    |        | Lys                    | [31]       |
|                                |                                                                                                                                                                            | Enzyme-treated                                              | Growing pigs  | 55.6                            | 81    |        | n/a                    | [5]        |
|                                |                                                                                                                                                                            | Enzyme-treated                                              | Weanling pigs | 56.8                            | 85    |        | SAA                    | [19]       |
|                                |                                                                                                                                                                            | Enzyme-treated                                              | Weanling pigs | 52.1                            | 84    |        | SAA                    | [19]       |
|                                |                                                                                                                                                                            | Enzyme-treated                                              | Weanling pigs | 54.4                            | 87    |        | Lys                    | [31]       |
|                                |                                                                                                                                                                            |                                                             | Weanling rats | n/a                             |       | 82     | Trp                    | [38]       |
|                                |                                                                                                                                                                            | Autoclaved (121 °C, 20 min)                                 | Weanling rats | n/a                             |       | 85     | Lys                    | [38]       |
|                                |                                                                                                                                                                            |                                                             | Young rats    | n/a                             |       | 82     | Trp                    | [39]       |
|                                |                                                                                                                                                                            |                                                             | Adult rats    | n/a                             |       | 74     | Trp                    | [39]       |
|                                | Soybean meal <5% crude fiber<br>Soybean meal >5% crude fiber<br>Soybean meal<br>Conventional soybean meal<br>High-protein soybean meal<br>Low-oligosaccharide soybean meal | Autoclaved (121 °C, 20 min)                                 | Young rats    | n/a                             |       | 83     | Lys                    | [39]       |
|                                |                                                                                                                                                                            | Autoclaved (121 °C, 20 min)                                 | Adult rats    | n/a                             |       | 80     | Lys                    | [39]       |
|                                |                                                                                                                                                                            | Secondary toasted (95-100 °C) in presence of lignosulfonate | Growing pigs  |                                 | 45    |        | Lys                    | [23]       |
|                                |                                                                                                                                                                            |                                                             | Pigs          | 47.1                            | 95    |        | SAA                    | [8]        |
|                                |                                                                                                                                                                            |                                                             | Pigs          | 44.6                            | 88    |        | SAA                    | [8]        |
|                                |                                                                                                                                                                            | Extruded                                                    | Pigs          | 47.4                            | 96    |        | Lys                    | [8]        |
|                                |                                                                                                                                                                            | Extruded (145 °C)                                           | Growing pigs  | 47.1                            | 89    |        | SAA                    | [18]       |
|                                |                                                                                                                                                                            | Extruded (145 °C)                                           | Growing pigs  | 56.0                            | 88    |        | SAA                    | [18]       |
|                                |                                                                                                                                                                            | Extruded (145 °C)                                           | Growing pigs  | 49.3                            | 97    |        | SAA                    | [18]       |
|                                |                                                                                                                                                                            |                                                             |               |                                 |       |        |                        |            |
| <b>Soy protein flour</b>       |                                                                                                                                                                            |                                                             | Growing pigs  |                                 | 89    | 98     | Lys, SAA, respectively | [40]       |
|                                | Soy protein B                                                                                                                                                              | Microbially fermented                                       | Piglets       | 55.7                            | 67    |        | Lys                    | [11]       |
|                                | Soy protein A1                                                                                                                                                             | Enzymatically fermented                                     | Piglets       | 53.3                            | 70    |        | SAA                    | [11]       |
|                                | Soy protein A3                                                                                                                                                             | Enzymatically fermented                                     | Piglets       | 57.7                            | 82    |        | SAA                    | [11]       |
|                                |                                                                                                                                                                            | Textured                                                    | Adult rats    |                                 |       | 65     | SAA                    | [13]       |
| <b>Soy protein concentrate</b> |                                                                                                                                                                            |                                                             | Weanling pigs | 62.1                            | 80    |        | SAA                    | [19]       |
|                                |                                                                                                                                                                            |                                                             | Pigs          | 65.4                            | 110   |        | Lys                    | [8]        |

| Product                    | Additional information               | Post-processing of product                | Type of study     | Crude protein<br>(% wet matter) | DIAAS | PDCAAS | Limiting AA | References |
|----------------------------|--------------------------------------|-------------------------------------------|-------------------|---------------------------------|-------|--------|-------------|------------|
|                            | Soy protein concentrate +<br>phytase |                                           | Weanling pigs     | 61.2                            | 87    |        | SAA         | [27]       |
|                            |                                      |                                           | Growing pigs      | 64.2                            | 97    |        | SAA         | [10]       |
|                            |                                      |                                           | Growing pigs      | 65.2                            | 86    |        | n/a         | [5]        |
|                            | Soy protein concentrate Lab A        |                                           | Weanling rats     | 74.6                            |       | 106    | Thr         | [41]       |
|                            | Soy protein concentrate Lab B        |                                           | Weanling rats     | 74.7                            |       | 101    | Trp         | [41]       |
|                            | Soy protein concentrate A, coarse    |                                           | Piglets           | 65.4                            | 83    |        | SAA         | [11]       |
|                            | Soy protein concentrate B, coarse    |                                           | Piglets           | 66.5                            | 78    |        | SAA         | [11]       |
|                            | Soy protein concentrate B, fine      |                                           | Piglets           | 71.9                            | 75    |        | SAA         | [11]       |
|                            |                                      |                                           | Early weaned pigs | 66.3                            | 94    |        | Lys         | [36]       |
| <b>Soy protein isolate</b> | Soy protein isolate A                |                                           | Growing rats      | n/a                             | 90    | 102    | SAA         | [42]       |
|                            | Soy protein isolate B                |                                           | Growing rats      | n/a                             | 90    | 97     | SAA         | [42]       |
|                            |                                      |                                           | Weanling pigs     | 77.9                            | 86    |        | SAA         | [31]       |
|                            |                                      |                                           | Growing pigs      | 84.8                            | 75    |        | n/a         | [5]        |
|                            |                                      |                                           | Weanling rats     | n/a                             |       | 80     | SAA         | [43]       |
|                            |                                      |                                           | Rats              | 84.2                            |       | 87     | SAA         | [44]       |
|                            | Soy protein isolate 1 (Lab A)        |                                           | Weanling rats     | 86.5                            |       | 102    | SAA         | [41]       |
|                            | Soy protein isolate 1 (Lab B)        |                                           | Weanling rats     | 87.5                            |       | 95     | SAA         | [41]       |
|                            | Soy protein isolate 2 (Lab A)        |                                           | Weanling rats     | 85.9                            |       | 102    | SAA         | [41]       |
|                            | Soy protein isolate 2 (Lab B)        |                                           | Weanling rats     | 87.0                            |       | 95     | SAA         | [41]       |
|                            | Soy protein isolate 3 (Lab A)        |                                           | Weanling rats     | 85.7                            |       | 102    | SAA         | [41]       |
|                            | Soy protein isolate 3 (Lab B)        |                                           | Weanling rats     | 86.7                            |       | 98     | SAA         | [41]       |
|                            |                                      | Hydrolyzed                                | Growing pigs      | 92.7                            | 84    | 93     | SAA         | [40]       |
|                            |                                      |                                           | Piglets           | 84.1                            | 69    |        | SAA         | [11]       |
|                            |                                      |                                           | Young rats        | n/a                             |       | 100    | Lys + SAA   | [39]       |
|                            |                                      |                                           | Adult rats        | n/a                             |       | 98     | Lys + SAA   | [39]       |
|                            |                                      | Alkaline/heat-treated (75 °C,<br>180 min) | Young rats        | n/a                             |       | 48     | SAA         | [39]       |



| Product        | Additional information | Post-processing of product             | Type of study   | Crude protein<br>(% wet matter) | DIAAS | PDCAAS | Limiting AA | References |
|----------------|------------------------|----------------------------------------|-----------------|---------------------------------|-------|--------|-------------|------------|
|                |                        | Alkaline/heat-treated (75 °C, 180 min) | Adult rats      | n/a                             |       | 35     | SAA         | [39]       |
|                |                        |                                        | Weanling rats   | n/a                             |       | 101    | Lys, SAA    | [38]       |
|                |                        | Alkaline/heat-treated (75 °C, 180 min) | Weanling rats   | n/a                             |       | 49     | SAA         | [38]       |
| <b>Tofu</b>    |                        |                                        | Adult minipigs  | 10.9                            | 75    |        | SAA         | [45]       |
|                |                        |                                        | Rats            | n/a                             | 52    | 56     | n/a         | [46]       |
|                |                        |                                        | <i>In-vitro</i> | 11.3                            |       | 103    | Lys         | [47]       |
|                |                        | Fried (170 °C, 20 sec)                 | <i>In-vitro</i> | 21.2                            |       | 78     | Lys         | [47]       |
| <b>Soymilk</b> |                        | Ultra-high processed (UHT)             | Adult minipigs  | 3.8                             | 91    |        | Lys         | [45]       |

**Supplementary Table 5:** Digestible indispensable amino acid scores (DIAAS) (mean  $\pm$  SD) for total soy and non-post-processed<sup>1</sup> soybean meal obtained from studies in growing and weanling pigs.

| Study conditions (number of datasets)                | DIAAS           |
|------------------------------------------------------|-----------------|
| Total soy, growing pigs (n=50)                       | 85.6 $\pm$ 12.3 |
| Total soy, weanling pigs (n=26)                      | 81.9 $\pm$ 7.5  |
| Total non-post-processed soy, growing pigs (n=37)    | 87.4 $\pm$ 10.7 |
| Tot non-post-processed soy, weanling pigs (n=14)     | 85.2 $\pm$ 5.3  |
| Non-post-processed soybean meal, growing pigs (n=27) | 88.5 $\pm$ 10.6 |
| Non-post-processed soybean meal, weanling pigs (n=7) | 87.1 $\pm$ 3.1  |

<sup>1</sup>Assumed since no post-processing treatments were mentioned in the original articles.

**Supplementary Table 6:** Protein digestibility corrected amino acid scores (PDCAAS) (mean  $\pm$  SD) for total soy and non-post-processed<sup>1</sup> soy protein isolate obtained from studies in adult and weanling rats.

| Study conditions (number of datasets)                       | PDCAAS          |
|-------------------------------------------------------------|-----------------|
| Total soy, adult rats (n=11)                                | 73.7 $\pm$ 21.3 |
| Total soy, weanling rats (n=21)                             | 90.8 $\pm$ 16.2 |
| Total non-post-processed soy, adult rats (n=6)              | 85.7 $\pm$ 17.6 |
| Total non-post-processed soy, weanling rats (n=13)          | 95.8 $\pm$ 8.6  |
| Non-post-processed soy protein isolate, adult rats (n=4)    | 96.0 $\pm$ 6.2  |
| Non-post-processed soy protein isolate, weanling rats (n=9) | 97.1 $\pm$ 7.0  |

<sup>1</sup>Assumed since no post-processing treatments were mentioned in the original articles.

## References Supplementary Material

1. FAO. *Dietary protein quality evaluation in human nutrition. Report of an FAO Expert Consultation*. FAO Food Nutr Pap, 2013. **92**: p. 1-66.
2. FAO/WHO/UNU Expert Consultation. *Energy and protein requirements Report of a Joint FAO/WHO/UNU Expert Consultation*, in *WHO Technical Report Series No. 724*. 1985, WHO: Geneva.
3. Stone AK, Nosworthy MG, Chiremba C, House JD, Nickerson MT. *A comparative study of the functionality and protein quality of a variety of legume and cereal flours*. Cereal Chemistry, 2019. **96**(6): p. 1159-1169. doi: 10.1002/cche.10226
4. Aderibigbe AS, Park CS, Adebisi A, Olukosi OA, Adeola O. *Digestibility of Amino Acids in Protein-Rich Feed Ingredients Originating from Animals, Peanut Flour, and Full-Fat Soybeans Fed to Pigs*. Animals, 2020. **10**(11): p. 2062. doi: 10.3390/ani10112062
5. NRC, *Nutrient Requirements of Swine: Eleventh Revised Edition*. 2012, The National Academies Press: Washington, DC. <https://doi.org/10.17226/13298>
6. CVB, *Chemical compositions and nutritional values of feed ingredients*. 2016, Centraal Veevoeder Bureau: Wageningen, the Netherlands
7. Kaewtapee C, Eklund M, Wiltafsky M, Piepho H-P, Mosenthin R, Rosenfelder P. *Influence of wet heating and autoclaving on chemical composition and standardized ileal crude protein and amino acid digestibility in full-fat soybeans for pigs 1,2*. Journal of Animal Science, 2017. **95**(2): p. 779-788. doi: 10.2527/jas.2016.0932
8. AFZ, Ajinomoto Eurolysine, Aventis Animal Nutrition, INRA, ITCF, 2000. *AmiPig, Ileal standardised digestibility of amino acids in feedstuffs for pigs*.
9. Agengo FB, Serrem CA, Wamunga FW. *Evaluation of protein nutritional quality of four soybean varieties grown in Western Kenya*. Journal of Food Research, 2018. **7**(5): p. 69-78. doi: 10.5539/jfr.v7n5p69
10. Cervantes-Pahm SK, Stein HH. *Effect of dietary soybean oil and soybean protein concentration on the concentration of digestible amino acids in soybean products fed to growing pigs 1*. Journal of Animal Science, 2008. **86**(8): p. 1841-1849. doi: 10.2527/jas.2007-0721
11. Urbaityte R, Mosenthin R, Eklund M, Piepho H-P, Sauer N, Rademacher M. *Standardised ileal crude protein and amino acid digestibilities in protein supplements for piglets*. Archives of Animal Nutrition, 2009. **63**(5): p. 356-378. doi: 10.1080/17450390903052631
12. Sauvant D, Perez JM, Tran G. *Tables of composition and nutritional value of feed materials: pigs, poultry, cattle, sheep, goats, rabbits, horses and fish*. 2004, Wageningen Academic Publishers.
13. Pires CV, Oliveira MGDA, Rosa JC, Costa NMB. *Nutritional quality and chemical score of amino acids from different protein sources*. Food Science and Technology, 2006. **26**(1): p. 179-187. doi: 10.1590/S0101-20612006000100029
14. Rodriguez DA, Lee SA, De Godoy MRC, Stein HH. *Extrusion of soybean hulls does not increase digestibility of amino acids or concentrations of digestible and metabolizable energy when fed to growing pigs*. Translational Animal Science, 2020. **4**(3). doi: 10.1093/tas/txaa169

15. Woyengo TA, Jha R, Beltranena E, Pharazyn A, Zijlstra RT. *Nutrient digestibility of lentil and regular- and low-oligosaccharide, micronized full-fat soybean fed to grower pigs*. Journal of Animal Science, 2014. **92**(1): p. 229-237. doi: 10.2527/jas.2013-6555
16. Berrocoso JD, Rojas OJ, Liu Y, Shoulders J, González-Vega JC, Stein HH. *Energy concentration and amino acid digestibility in high-protein canola meal, conventional canola meal, and soybean meal fed to growing pigs*. Journal of Animal Science, 2015. **93**(5): p. 2208-2217. doi: 10.2527/jas.2014-8528
17. Le Thanh BV, Beltranena E, Zhou X, Wang LF, Zijlstra RT. *Amino acid and energy digestibility of Brassica napus canola meal from different crushing plants fed to ileal-cannulated grower pigs*. Animal Feed Science and Technology, 2019. **252**: p. 83-91. doi: 10.1016/j.anifeedsci.2019.04.008
18. Baker KM, Stein HH. *Amino acid digestibility and concentration of digestible and metabolizable energy in soybean meal produced from conventional, high-protein, or low-oligosaccharide varieties of soybeans and fed to growing pigs*. Journal of Animal Science, 2009. **87**(7): p. 2282-2290. doi: 10.2527/jas.2008-1414
19. Navarro DMDL, Liu Y, Bruun TS, Stein HH. *Amino acid digestibility by weanling pigs of processed ingredients originating from soybeans, 00-rape seeds, or a fermented mixture of plant ingredients*. Journal of Animal Science, 2017. **95**(6): p. 2658-2669. doi: 10.2527/jas.2016.1356
20. González-Vega JC, Stein HH. *Amino acid digestibility in canola, cottonseed, and sunflower products fed to finishing pigs*. Journal of Animal Science, 2012. **90**(12): p. 4391-4400. doi: 10.2527/jas.2011-4631
21. Son AR, Park CS, Park KR, Kim BG. *Amino acid digestibility in plant protein sources fed to growing pigs*. Asian-Australasian journal of animal sciences, 2019. **32**(11): p. 1745-1752. doi: 10.5713/ajas.19.0037
22. Wang JP, Kim JD, Kim JE, Kim IH. *Amino acid digestibility of single cell protein from Corynebacterium ammoniagenes in growing pigs*. Animal Feed Science and Technology, 2013. **180**(1): p. 111-114. doi: 10.1016/j.anifeedsci.2012.12.006
23. Hulshof TG, Bikker P, Van Der Poel AFB, Hendriks WH. *Assessment of protein quality of soybean meal and 00-rape seed meal toasted in the presence of lignosulfonate by amino acid digestibility in growing pigs and Maillard reaction products*. Journal of Animal Science, 2016. **94**(3): p. 1020-1030. doi: 10.2527/jas.2015-9700
24. Petersen GI, Liu Y, Stein HH. *Coefficient of standardized ileal digestibility of amino acids in corn, soybean meal, corn gluten meal, high-protein distillers dried grains, and field peas fed to weanling pigs*. Animal Feed Science and Technology, 2014. **188**: p. 145-149. doi: 10.1016/j.anifeedsci.2013.11.002
25. Kim K, Goel A, Lee S, Choi Y, Chae B-J. *Comparative ileal amino acid digestibility and growth performance in growing pigs fed different level of canola meal*. Journal of Animal Science and Technology, 2015. **57**(1): p. 21. doi: 10.1186/s40781-015-0055-3
26. Rojas OJ, Stein HH. *Concentration of digestible, metabolizable, and net energy and digestibility of energy and nutrients in fermented soybean meal, conventional soybean meal, and fish meal fed to weanling pigs*. Journal of Animal Science, 2013. **91**(9): p. 4397-4405. doi: 10.2527/jas.2013-6409

27. Oliveira MS, Stein HH. *Digestibility of energy, amino acids, and phosphorus in a novel source of soy protein concentrate and in soybean meal fed to growing pigs*. Journal of Animal Science, 2016. **94**(8): p. 3343-3352. doi: 10.2527/jas.2016-0505
28. Liu Y, Song M, Maisson T, Stein HH. *Effects of protein concentration and heat treatment on concentration of digestible and metabolizable energy and on amino acid digestibility in four sources of canola meal fed to growing pigs*. Journal of Animal Science, 2014. **92**(10): p. 4466-4477. doi: 10.2527/jas.2013-7433
29. Liu Y, Jaworski NW, Rojas OJ, Stein HH. *Energy concentration and amino acid digestibility in high protein canola meal, conventional canola meal, and in soybean meal fed to growing pigs*. Animal Feed Science and Technology, 2016. **212**: p. 52-62. doi: 10.1016/j.anifeedsci.2015.11.017
30. Jondreville C, Broecke JVD, Gâtel F, Grosjean F, Cauwenberghe SV, Sève B. *Ileal amino acid digestibility and estimates of endogenous amino acid losses in pigs fed rapeseed meal, sunflower meal and soybean meal*. Canadian Journal of Animal Science, 2000. **80**(3): p. 495-506. doi: 10.4141/a99-104
31. Cervantes-Pahm SK, Stein HH. *Ileal digestibility of amino acids in conventional, fermented, and enzyme-treated soybean meal and in soy protein isolate, fish meal, and casein fed to weanling pigs I*. Journal of Animal Science, 2010. **88**(8): p. 2674-2683. doi: 10.2527/jas.2009-2677
32. Kong C, Kang HG, Kim BG, Kim KH. *Ileal digestibility of amino acids in meat meal and soybean meal fed to growing pigs*. Asian-Australasian journal of animal sciences, 2014. **27**(7): p. 990-995. doi: 10.5713/ajas.2014.14217
33. Lee SA, Ahn JY, Son AR, Kim BG. *Standardized ileal digestibility of amino acids in cereal grains and co-products in growing pigs*. Asian-Australasian journal of animal sciences, 2020. **33**(7): p. 1148-1155. doi: 10.5713/ajas.19.0449
34. Kaewtapee C, Mosenthin R, Nenning S, Wiltafsky M, Schäffler M, Eklund M, et al. *Standardized ileal digestibility of amino acids in European soya bean and rapeseed products fed to growing pigs*. J Anim Physiol Anim Nutr (Berl), 2018. **102**(2): p. e695-e705. doi: 10.1111/jpn.12814
35. Stein HH, Kim SW, Nielsen TT, Easter RA. *Standardized ileal protein and amino acid digestibility by growing pigs and sows*. Journal of Animal Science, 2001. **79**(8): p. 2113-2122. doi: 10.2527/2001.7982113x
36. Zhang HY, Yi JQ, Piao XS, Li PF, Zeng ZK, Wang D, et al. *The Metabolizable Energy Value, Standardized Ileal Digestibility of Amino Acids in Soybean Meal, Soy Protein Concentrate and Fermented Soybean Meal, and the Application of These Products in Early-weaned Piglets*. Asian-Australasian journal of animal sciences, 2013. **26**(5): p. 691-699. doi: 10.5713/ajas.2012.12429
37. Graham A, Derouchey J, Goodband R, Tokach M, Dritz S, Thaler R. *Amino acid digestibility and energy concentration of fermented soybean meal and camelina meal for swine*. Kansas Agricultural Experiment Station Research Reports, 2013: p. 246-255. doi: 10.4148/2378-5977.7035
38. Sarwar G. *The protein digestibility-corrected amino acid score method overestimates quality of proteins containing antinutritional factors and of poorly digestible proteins*

- supplemented with limiting amino acids in rats*. J Nutr, 1997. **127**(5): p. 758-64. doi: 10.1093/jn/127.5.758
39. Gilani GS, Sepehr E. *Protein Digestibility and Quality in Products Containing Antinutritional Factors Are Adversely Affected by Old Age in Rats*. The Journal of Nutrition, 2003. **133**(1): p. 220-225. doi: 10.1093/jn/133.1.220
  40. Mathai JK, Liu Y, Stein HH. *Values for digestible indispensable amino acid scores (DIAAS) for some dairy and plant proteins may better describe protein quality than values calculated using the concept for protein digestibility-corrected amino acid scores (PDCAAS)*. British Journal of Nutrition, 2017. **117**(4): p. 490-499. doi: 10.1017/S0007114517000125
  41. Hughes GJ, Ryan DJ, Mukherjea R, Schasteen CS. *Protein Digestibility-Corrected Amino Acid Scores (PDCAAS) for Soy Protein Isolates and Concentrate: Criteria for Evaluation*. Journal of Agricultural and Food Chemistry, 2011. **59**(23): p. 12707-12712. doi: 10.1021/jf203220v
  42. Rutherford SM, Fanning AC, Miller BJ, Moughan PJ. *Protein Digestibility-Corrected Amino Acid Scores and Digestible Indispensable Amino Acid Scores Differentially Describe Protein Quality in Growing Male Rats*. The Journal of Nutrition, 2014. **145**(2): p. 372-379. doi: 10.3945/jn.114.195438
  43. Sun M, Mu T, Zhang M, Arogundade LA. *Nutritional assessment and effects of heat processing on digestibility of Chinese sweet potato protein*. Journal of Food Composition and Analysis, 2012. **26**(1): p. 104-110. doi: 10.1016/j.jfca.2012.03.008
  44. Fleddermann M, Fechner A, Rößler A, Bähr M, Pastor A, Liebert F, et al. *Nutritional evaluation of rapeseed protein compared to soy protein for quality, plasma amino acids, and nitrogen balance – A randomized cross-over intervention study in humans*. Clinical Nutrition, 2013. **32**(4): p. 519-526. doi: 10.1016/j.clnu.2012.11.005
  45. Reynaud Y, Buffière C, Cohade B, Vauris M, Liebermann K, Hafnaoui N, et al. *True ileal amino acid digestibility and digestible indispensable amino acid scores (DIAASs) of plant-based protein foods*. Food Chemistry, 2021. **338**: p. 128020. doi: 10.1016/j.foodchem.2020.128020
  46. Marinangeli CPF, House JD. *Potential impact of the digestible indispensable amino acid score as a measure of protein quality on dietary regulations and health*. Nutr Rev, 2017. **75**(8): p. 658-667. doi: 10.1093/nutrit/nux025
  47. Anwar D, El-Chaghaby G. *Nutritional quality, amino acid profiles, protein digestibility corrected amino acid scores and antioxidant properties of fried tofu and seitan*. 2019, 2019. **18**(3).
